# Supplementary material for: Salmo salar fish waste oil: Fatty acids composition and antibacterial activity
Source: PeerJ. 2020 Jun 19;8:e9299. doi: 10.7717/peerj.9299 (PMC7307567; doi:10.7717/peerj.9299)
Supplement: Supplemental Information 5 [file peerj-08-9299-s005.xlsx]

## Sheet: Head_Mic1
										Ctrl Substance	K+	Blank
S.aureus ATCC 6538	0.09	0.086	0.733	0.802	0.817	0.823	0.828			0.148	0.873	0.084
S.aureus ATCC 25923	0.079	0.079	0.347	0.775	0.838	0.843	0.845			0.152	0.9	0.072
P.aeruginosa ATCC 9027	0.084	0.084	0.779	0.785	0.791	0.797	0.799			0.145	0.832	0.082
P.aeruginosa ATCC15442	0.083	0.082	0.845	0.851	0.855	0.861	0.865			0.155	0.992	0.079
										0.15
Blank substracted
S.aureus ATCC 6538	-0.06	-0.064	0.583	0.652	0.667	0.673	0.678			-0.002	0.723	-0.066
S.aureus ATCC 25923	-0.071	-0.071	0.197	0.625	0.688	0.693	0.695			0.002	0.75	-0.078
P.aeruginosa ATCC 9027	-0.066	-0.066	0.629	0.635	0.641	0.647	0.649			-0.005	0.682	-0.068
P.aeruginosa ATCC15442	-0.067	-0.068	0.695	0.701	0.705	0.711	0.715			0.005	0.842	-0.071
Concentration %(v/v)	50	25	12.5	6.25	3125	1562	0.75			50	0	Blank

## Sheet: Head_Mic2
										Ctrl Substance	K+	Blank
S.aureus ATCC 6538	0.094	0.087	0.733	0.806	0.821	0.829	0.835			0.148	0.877	0.084
S.aureus ATCC 25923	0.085	0.082	0.347	0.779	0.841	0.844	0.848			0.16	0.904	0.072
P.aeruginosa ATCC 9027	0.09	0.086	0.787	0.786	0.797	0.797	0.802			0.152	0.836	0.09
P.aeruginosa ATCC15442	0.091	0.084	0.845	0.86	0.861	0.87	0.867			0.159	0.993	0.082
										0.155
Blank substracted
S.aureus ATCC 6538	-0.06	-0.068	0.578	0.651	0.666	0.673	0.679			-0.006	0.722	-0.0712
S.aureus ATCC 25923	-0.069	-0.073	0.191	0.623	0.686	0.689	0.693			0.005	0.749	-0.083
P.aeruginosa ATCC 9027	-0.065	-0.068	0.631	0.631	0.641	0.642	0.646			-0.003	0.681	-0.065
P.aeruginosa ATCC15442	-0.063	-0.07	0.69	0.705	0.706	0.714	0.712			0.004	0.838	-0.073
Concentration %(v/v)	50	25	12.5	6.25	3125	1562	0.75			50	0	Blank

## Sheet: Head_Mic3
										Ctrl Substance	K+	Blank
S.aureus ATCC 6538	0.089	0.078	0.725	0.794	0.815	0.817	0.818			0.143	0.865	0.077
S.aureus ATCC 25923	0.078	0.069	0.343	0.773	0.829	0.838	0.839			0.143	0.897	0.068
P.aeruginosa ATCC 9027	0.077	0.080	0.773	0.778	0.788	0.787	0.797			0.136	0.830	0.078
P.aeruginosa ATCC15442	0.079	0.074	0.843	0.841	0.848	0.851	0.863			0.148	0.988	0.078
										0.143
Blank substracted
S.aureus ATCC 6538	-0.05	-0.06	0.582	0.651	0.672	0.674	0.675			7742	0.722	-0.06
S.aureus ATCC 25923	-0.06	-0.07	0.200	0.630	0.686	0.695	0.696			0.000	0.754	-0.07
P.aeruginosa ATCC 9027	-0.06	-0.06	0.630	0.635	0.645	0.644	0.654			-0.00	0.687	-0.06
P.aeruginosa ATCC15442	-0.06	-0.06	0.699	0.698	0.705	0.708	0.720			0.005	0.845	-0.06
Concentration %(v/v)	50	25	12.5	6.25	3125	1562	0.75			50	0	Blank

## Sheet: SoftTissue_Mic1
										Ctrl Substance	K+	Blank
S.aureus ATCC 6538	0.093	0.087	0.088	0.803	0.817	0.827	0.831			0.148	0.874	0.084
S.aureus ATCC 25923	0.079	0.082	0.082	0.777	0.838	0.844	0.848			0.154	0.902	0.072
P.aeruginosa ATCC 9027	0.084	0.088	0.087	0.785	0.794	0.800	0.803			0.148	0.833	0.083
P.aeruginosa ATCC15442	0.085	0.082	0.085	0.854	0.859	0.862	0.865			0.156	0.993	0.083
										0.151
Blank substracted
S.aureus ATCC 6538	-0.05	-0.06	-0.06	0.651	0.665	0.675	0.679			-0.00	0.722	-0.06
S.aureus ATCC 25923	-0.07	-0.06	-0.06	0.626	0.686	0.692	0.696			0.002	0.750	-0.07
P.aeruginosa ATCC 9027	-0.06	-0.06	-0.06	0.633	0.642	0.648	0.651			-0.00	0.681	-0.06
P.aeruginosa ATCC15442	-0.06	-0.06	-0.06	0.702	0.708	0.710	0.714			0.004	0.841	-0.06
Concentration %(v/v)	50	25	12.5	6.25	3125	1562	0.75			50	0	Blank

## Sheet: SoftTissue_Mic2
										Ctrl Substance	K+	Blank
S.aureus ATCC 6538	0.097	0.087	0.090	0.815	0.830	0.835	0.834			0.157	0.880	0.084
S.aureus ATCC 25923	0.092	0.079	0.086	0.779	0.848	0.849	0.849			0.164	0.907	0.080
P.aeruginosa ATCC 9027	0.089	0.093	0.086	0.789	0.798	0.806	0.805			0.155	0.839	0.084
P.aeruginosa ATCC15442	0.094	0.093	0.086	0.862	0.866	0.875	0.871			0.165	1004	0.085
										0.160
Blank substracted
S.aureus ATCC 6538	-0.06	-0.07	-0.06	0.654	0.670	0.674	0.673			-0.00	0.719	-0.07
S.aureus ATCC 25923	-0.06	-0.08	-0.07	0.618	0.688	0.689	0.688			0.003	0.746	-0.07
P.aeruginosa ATCC 9027	-0.07	-0.06	-0.07	0.629	0.637	0.645	0.644			-0.00	0.679	-0.07
P.aeruginosa ATCC15442	-0.06	-0.06	-0.07	0.701	0.705	0.714	0.711			0.004	0.844	-0.07
Concentration %(v/v)	50	25	12.5	6.25	3125	1562	0.75			50	0	Blank

## Sheet: SoftTissue_Mic3
										Ctrl Substance	K+	Blank
S.aureus ATCC 6538	0.085	0.085	0.085	0.803	0.812	0.823	0.821			0.146	0.872	0.083
S.aureus ATCC 25923	0.071	0.074	0.078	0.769	0.837	0.844	0.837			0.152	0.902	0.067
P.aeruginosa ATCC 9027	0.082	0.082	0.081	0.786	0.788	0.793	0.790			0.140	0.830	0.082
P.aeruginosa ATCC15442	0.079	0.079	0.074	0.849	0.852	0.862	0.861			0.155	0.989	0.076
										0.148
Blank substracted
S.aureus ATCC 6538	-0.06	-0.06	-0.06	0.654	0.663	0.674	0.672			-0.00	0.723	-0.06
S.aureus ATCC 25923	-0.07	-0.07	-0.07	0.620	0.688	0.695	0.689			0.003	0.753	-0.08
P.aeruginosa ATCC 9027	-0.06	-0.06	-0.06	0.638	0.639	0.644	0.641			-0.00	0.681	-0.06
P.aeruginosa ATCC15442	-0.06	-0.06	-0.07	0.700	0.703	0.713	0.712			0.007	0.840	-0.07
Concentration %(v/v)	50	25	12.5	6.25	3125	1562	0.75			50	0	Blank
